### References

1. Klatskin G: Introduction: Mechanism of toxic and drug induced hepatic injury, Toxicity of Anesthetics. Edited by BR Fink. Baltimore, Williams & Wilkins Co., 1968, pp 159-175
2. Paronetto F, Popper H: Lymphocyte stimulation induced by halothane in patients with hepatitis following exposure to halothane. *N Engl J Med* 283:277-280, 1970
3. Cohen EN: Metabolism of volatile anesthetics. *ANESTHESIOLOGY* 35:193-202, 1971
4. Airaksinen MM, Kurki M, Rosenberg PH, et al: Distribution and fate of trifluoroethanol in rats. *Ann Med Exp Biol Fenn* 49:79-83, 1971
5. Carney FMT, Van Dyke RA: Halothane hepatitis: A critical review. *Anesth Analg (Cleve)* 51:135-160, 1972
6. Stier A: Trifluoroacetic acid as metabolite of halothane. *Biochem Pharmacol* 13:1544, 1964
7. Stier A, Alter H: Stoffwechselprodukte des Halothan im Urin. *Anaesthesist* 15:154-155, 1966
8. Van Dyke RA, Chenoweth MB: Metabolism of volatile anesthetics. *ANESTHESIOLOGY* 26: 348, 1965
9. Rosenberg PH, Wahlström T: Hepatotoxicity of halothane metabolites *in vivo* and inhibition of fibroblast growth *in vitro*. *Acta Pharmacol Toxicol* 29:9-19, 1971
10. Bunker JP, Blumenfeld CM: Liver necrosis after halothane anesthesia: Cause or coincidence? *N Engl J Med* 268:531-534, 1963
11. Belfrage S, Ahlgren I, Axelson S: Halothane hepatitis in an anaesthetist. *Lancet* 2:1466-1966
12. Klatskin G, Kimberg DV: Recurrent hepatitis attributable to halothane sensitization in an anaesthetist. *N Engl J Med* 280:512-522, 1969
13. Rodriguez M, Paronetto F, Schaffner F, et al: Antimitochondrial antibodies in jaundice following drug administration. *JAMA* 208: 148-150, 1969
14. Linder E: Differentiation of kidney antigens in the human foetus. *J Embryol Exp Morphol* 21:517-537, 1969
15. Doniach D: Cell-mediated immunity in halothane hypersensitivity. *N Engl J Med* 283: 315-316, 1970
16. Cohen EN, Hood N: Application of low-temperature autoradiography to studies of the uptake and metabolism of volatile anesthetics in the mouse. III. Halothane. *ANESTHESIOLOGY* 31:553-559, 1969
17. Airaksinen MM, Rosenberg PH, Tammisto T: A possible mechanism of toxicity of trifluoroethanol and other halothane metabolites. *Acta Pharmacol Toxicol* 28:299-304, 1970
18. Cohen EN: Metabolism of halothane-2 <sup>14</sup>C in the mouse. *ANESTHESIOLOGY* 31:560-565, 1969
19. Blake DA, Barry JQ, Cascorbi HF: Qualitative analysis of halothane metabolites in man. *ANESTHESIOLOGY* 36:152-154, 1972
20. Blake DA, Cascorbi HF, Rozman RS, et al: Animal toxicity of 2,2,2-trifluoroethanol. *Toxicol Appl Pharmacol* 15:83-91, 1969

### Paraphernalia

**THERMODILUTION CARDIAC OUTPUT** The Swan-Ganz catheter is a balloon-tipped double-lumen tube which can be passed from a peripheral vein through the right heart and into the pulmonary artery. Through it can be measured right atrial, pulmonary arterial, and pulmonary wedge pressures. This catheter has now been modified by adding a thermistor near the tip, thus permitting measurement of cardiac output by the thermodilution technique. Fidelity of pressure response through the catheter, and accuracy and precision of the thermodilution method, were measured and found satisfactory. This catheter was used in 33 patients with no apparent complications. Repeated right and left ventricular function curves were made, which permitted better assessment of therapy. (Forrester, J. S., and others: *Thermodilution Cardiac Output Determination with a Single Flow-directed Catheter*, *Amer. Heart J.* 83: 1972.)
